# Supplementary material for: The Shifting Role and Regulation of the Corpus Luteum in Vertebrate Reproduction: A Synthetic Review
Source: Preprints.org preprint supplement (doi:10.20944/preprints202406.0575.v2), 2024-10-29
Supplement: Supplementary file 1 [file supplementary]

## Sheet: Supplementary Data 1
Supplementary Data 1. Data of reproductive characters
Species	Common Name	Order	CL_type	Placental_P4	Ovulation	Prec/altr	Invasiveness
Dasypus_novemcinctus	Nine-banded armadillo	Cingulata		No	Spontaneous	prec	Hemochorial
Euphractus_sexcinctus	Six-banded armadillo	Cingulata	Short-lived	No	Spontaneous	altr	Hemochorial
Tolypeutes_matacus	Three-banded armadillo	Cingulata	Short-lived	No	Spontaneous	prec	Hemochorial
Myrmecophaga_tridactyla	Giant anteater	Cingulata	Short-lived		Spontaneous	altr	Hemochorial
Bradypus_torquatus	Maned three-toed sloth	Cingulata	Short-lived		Spontaneous	prec	Endotheliochorial
Choloepus_didactylus	Southern two-toed sloth	Cingulata	Short-lived		Spontaneous	prec	Endotheliochorial
Choloepus_hoffmanni	Two-toed sloth	Cingulata	Short-lived		Spontaneous	prec	Endotheliochorial
Loxodonta_africana	African savanna elephant	Proboscidea	Short-lived	No	Spontaneous	prec	Endotheliochorial
Elephas_maximus	Asian elephant	Proboscidea	Short-lived	No	Spontaneous	prec	Endotheliochorial
Dugong_dugon	Sea cow	Sirenia	Short-lived		Spontaneous	prec	Endotheliochorial
Trichechus_inunguis	Amazon manatee	Sirenia	Short-lived		Spontaneous	prec	Endotheliochorial
Procavia_capensis	Cape rock hyrax	Hyracoidea	Short-lived		Spontaneous	prec	Hemochorial
Tenrec_ecaudatus	Tailless tenrec	Macroscelidea			Induced	altr	Hemochorial
Echinops_telfairi	Small madagascar hedgehog	Macroscelidea	Short-lived		Induced	altr	Hemochorial
Elephantulus_myurus	Eastern rock elephant shrew	Afrosoricida	Short-lived	No	Spontaneous	prec	Hemochorial
Bos_taurus	Cattle	Artiodactyla	Short-lived	Yes	Spontaneous	prec	Epitheliochorial
Sus_scrofa	Pig	Artiodactyla	Short-lived	Yes	Spontaneous	prec	Epitheliochorial
Ovis_aries	Sheep	Artiodactyla	Short-lived	Yes	Spontaneous	prec	Epitheliochorial
Capra_nubiana	Goat	Artiodactyla	Short-lived	No	Spontaneous	prec	Epitheliochorial
Camelus_bactrianus	Bactrian camel	Artiodactyla	Short-lived	Yes	Induced	prec	Epitheliochorial
Naemorhedus_griseus	Chinese goral	Artiodactyla	Short-lived		Spontaneous	prec	Epitheliochorial
Tragulus_javanicus	Lesser Malay mouse deer	Artiodactyla	Short-lived		Spontaneous	prec	Epitheliochorial
Equus_caballus	Horse	Perissodactyla	Short-lived	Yes	Spontaneous	prec	Epitheliochorial
Rhinoceros_unicornis	Indian rhinoceros	Perissodactyla	Short-lived	Yes	Spontaneous	prec	Epitheliochorial
Ceratotherium_simum	White rhinoceros	Perissodactyla	Short-lived	Yes	Spontaneous	prec	Epitheliochorial
Dicerorhinus_sumatrensis	Asian rhinoceros	Perissodactyla	Short-lived	Yes	Induced	prec	Epitheliochorial
Delphinapterus_leucas	Beluga whale	Cetacea	Short-lived		Both	prec	Epitheliochorial
Tursiops_truncatus	Atlantic bottlenose dolphin	Cetacea	Short-lived		Spontaneous	prec	Epitheliochorial
Orcinus_orca	Orca whale	Cetacea	Short-lived		Spontaneous	prec	Epitheliochorial
Lagenorhynchus_obliquidens	Pacific white-sided dolphin	Cetacea	Short-lived		Spontaneous	prec	Epitheliochorial
Balaenoptera_bonaerensis	Minke whale	Cetacea	Short-lived	Yes	Spontaneous	prec	Epitheliochorial
Nycticeinops_schlieffeni	Schlieffen's bat	Chiroptera	Short-lived	No	Spontaneous	altr	Hemochorial
Rousettus_leschenaultii	Fulvous fruit bat	Chiroptera	Short-lived		Spontaneous	altr	Hemochorial
Carollia_perspicillata	Short-tailed Fruit Bat	Chiroptera	Short-lived		Spontaneous	prec	Hemochorial
Miniopterus_natalensis	Natal clinging bat	Chiroptera	Short-lived	Yes	Spontaneous	altr	Hemochorial
Myotis_lucifugus	Little brown bat	Chiroptera	Short-lived	Yes	Spontaneous	altr	Hemochorial
Mustela_lutreola	European Mink	Carnivora	Short-lived		Spontaneous	altr	Endotheliochorial
Mustela_erminea	Ermine	Carnivora	Short-lived		Spontaneous	altr	Endotheliochorial
Cystophora_cristata	Hooded seal	Carnivora		No	Spontaneous	prec	Endotheliochorial
Ursus_arctos	Brown bears	Carnivora		No	Both	altr	Endotheliochorial
Canis_lupus	Domestic dog	Carnivora	Long-lived	No	Spontaneous	altr	Endotheliochorial
Chrysocyon_brachyurus	Maned wolf	Carnivora	Long-lived	No	Induced	altr	Endotheliochorial
Panthera_leo	Lion	Carnivora	Short-lived		Both	altr	Endotheliochorial
Panthera_uncia	Snow leopard	Carnivora	Short-lived		Induced	altr	Endotheliochorial
Felis_catus	Domestic cat	Carnivora	Short-lived	Yes	Both	altr	Endotheliochorial
Lynx_lynx	Eurasian lynx	Carnivora	Short-lived	No	Both	altr	Endotheliochorial
Lynx_rufus	Bobcat	Carnivora	Short-lived	Yes	Both	altr	Endotheliochorial
Blarina_brevicauda	Short-tailed shrew	Eulipotyphla	Ultra-short	No	Induced	altr	Endotheliochorial
Solenodon_paradoxus	Hispaniolan solenodon	Eulipotyphla	Short-lived	No		altr	Endotheliochorial
Oryctolagus_cuniculus	European rabbit	Lagomorpha	Short-lived	Yes	Induced	altr	Hemochorial
Cavia_porcellus	Guinea pig	Rodents	Short-lived	Yes	Spontaneous	prec	Hemochorial
Lagostomus_maximus	Plains viscacha	Rodents	Short-lived	No	Spontaneous	prec	Hemochorial
Chinchilla_lanigera	Long-tailed chinchilla	Rodents	Short-lived		Spontaneous	prec	Hemochorial
Octodon_degus	Defu	Rodents	Short-lived			prec	Hemochorial
Heterocephalus_glaber	Naked mole rat	Rodents	Short-lived		Spontaneous	altr	Hemochorial
Fukomys_damarensis	Damaraland mole-rats	Rodents	Short-lived		Spontaneous	altr	Hemochorial
Aplodontia_rufa	Arena Mountain Beaver	Rodents	Short-lived		Spontaneous	altr	Hemochorial
Marmota_marmota	Alpine marmot	Rodents	Short-lived			altr	Hemochorial
Spermophilus_citellus	European ground squirrel	Rodents	Short-lived		Spontaneous	altr	Hemochorial
Dipodomys_phillipsii	Kangaroo rat	Rodents	Short-lived		Spontaneous	altr	Hemochorial
Mus_musculus	Mice	Rodents	Ultra-short	No	Spontaneous	altr	Hemochorial
Cricetus_cricetus	Hamster	Rodents	Ultra-short	No	Spontaneous	altr	Hemochorial
Rattus_norvegicus	Black rat	Rodents	Ultra-short	No	Spontaneous	altr	Hemochorial
Notomys_alexis	Spinifex hopping mouse	Rodents	Short-lived		Spontaneous	altr	Hemochorial
Acomys_cahirinus	African spiny mouse	Rodents	Short-lived	No	Spontaneous	prec	Hemochorial
Perodicticus_potto	West African potto	Primate	Short-lived		Spontaneous	prec	Epitheliochorial
Otolemur_crassicaudatus	Brown greater galago	Primate	Short-lived		Spontaneous	prec	Epitheliochorial
Carlito_syrichta	Philippines tarsier	Primate	Short-lived		Spontaneous	prec	Hemochorial
Lemur_catta	Ring-tailed lemur	Primate	Short-lived		Spontaneous	prec	Epitheliochorial
Callithrix_jacchus	Common marmoset	Primate	Short-lived	Yes	Spontaneous	prec	Hemochorial
Papio_papio	Baboon	Primate	Short-lived	Yes	Spontaneous	prec	Hemochorial
Macaca_mulatta	Rhesus macaque	Primate	Short-lived	Yes	Spontaneous	prec	Hemochorial
Homo_sapiens	Humans	Primate	Short-lived	Yes	Spontaneous	prec	Hemochorial
Loris_tardigradus	Slender loris	Primate	Short-lived		Spontaneous	prec	Epitheliochorial
Tupaia_montana	Tree shrew	Scadentia	Short-lived		Induced	altr	Endotheliochorial
Cephalopachus_bancanus	Tarsier	Primate	Short-lived		Spontaneous	prec	Hemochorial
Gorilla_gorilla	Gorilla	Primate	Short-lived	Yes	Spontaneous	prec	Hemochorial

## Sheet: Supplementary Data 2
Supplementary Data 2. Types of corpus luteum and MRP
Species	Common Name	Order	CL_type	MRP	Type
Dasypus_novemcinctus	Nine-banded armadillo	Cingulata
Euphractus_sexcinctus	Six-banded armadillo	Cingulata	Short-lived
Tolypeutes_matacus	Three-banded armadillo	Cingulata	Short-lived
Myrmecophaga_tridactyla	Giant anteater	Cingulata	Short-lived
Bradypus_torquatus	Maned three-toed sloth	Cingulata	Short-lived
Choloepus_didactylus	Southern two-toed sloth	Cingulata	Short-lived
Choloepus_hoffmanni	Two-toed sloth	Cingulata	Short-lived
Loxodonta_africana	African savanna elephant	Proboscidea	Short-lived	PL	Luteotrophic
Elephas_maximus	Asian elephant	Proboscidea	Short-lived	PL	Luteotrophic
Dugong_dugon	Sea cow	Sirenia	Short-lived
Trichechus_inunguis	Amazon manatee	Sirenia	Short-lived
Procavia_capensis	Cape rock hyrax	Hyracoidea	Short-lived
Tenrec_ecaudatus	Tailless tenrec	Macroscelidea
Echinops_telfairi	Small madagascar hedgehog	Macroscelidea	Short-lived
Elephantulus_myurus	Eastern rock elephant shrew	Afrosoricida	Short-lived
Bos_taurus	Cattle	Artiodactyla	Short-lived	IFNT	Anti-luteolytic
Sus_scrofa	Pig	Artiodactyla	Short-lived	E2	Anti-luteolytic
Ovis_aries	Sheep	Artiodactyla	Short-lived	IFNT	Anti-luteolytic
Capra_nubiana	Goat	Artiodactyla	Short-lived	IFNT	Anti-luteolytic
Camelus_bactrianus	Bactrian camel	Artiodactyla	Short-lived	E2	Anti-luteolytic
Naemorhedus_griseus	Chinese goral	Artiodactyla	Short-lived
Tragulus_javanicus	Lesser Malay mouse deer	Artiodactyla	Short-lived
Equus_caballus	Horse	Perissodactyla	Short-lived
Rhinoceros_unicornis	Indian rhinoceros	Perissodactyla	Short-lived
Ceratotherium_simum	White rhinoceros	Perissodactyla	Short-lived
Dicerorhinus_sumatrensis	Asian rhinoceros	Perissodactyla	Short-lived
Delphinapterus_leucas	Beluga whale	Cetacea	Short-lived
Tursiops_truncatus	Atlantic bottlenose dolphin	Cetacea	Short-lived
Orcinus_orca	Orca whale	Cetacea	Short-lived
Lagenorhynchus_obliquidens	Pacific white-sided dolphin	Cetacea	Short-lived
Balaenoptera_bonaerensis	Minke whale	Cetacea	Short-lived
Nycticeinops_schlieffeni	Schlieffen's bat	Chiroptera	Short-lived
Rousettus_leschenaultii	Fulvous fruit bat	Chiroptera	Short-lived
Carollia_perspicillata	Short-tailed Fruit Bat	Chiroptera	Short-lived
Miniopterus_natalensis	Natal clinging bat	Chiroptera	Short-lived
Myotis_lucifugus	Little brown bat	Chiroptera	Short-lived
Mustela_lutreola	European Mink	Carnivora	Short-lived
Mustela_erminea	Ermine	Carnivora	Short-lived
Cystophora_cristata	Hooded seal	Carnivora
Ursus_arctos	Brown bears	Carnivora
Canis_lupus	Domestic dog	Carnivora	Long-lived	Absent
Chrysocyon_brachyurus	Maned wolf	Carnivora	Long-lived	Absent
Panthera_leo	Lion	Carnivora	Short-lived
Panthera_uncia	Snow leopard	Carnivora	Short-lived
Felis_catus	Domestic cat	Carnivora	Short-lived
Lynx_lynx	Eurasian lynx	Carnivora	Short-lived
Lynx_rufus	Bobcat	Carnivora	Short-lived
Blarina_brevicauda	Short-tailed shrew	Eulipotyphla	Ultra-short
Solenodon_paradoxus	Hispaniolan solenodon	Eulipotyphla	Short-lived
Oryctolagus_cuniculus	European rabbit	Lagomorpha	Short-lived
Cavia_porcellus	Guinea pig	Rodents	Short-lived
Lagostomus_maximus	Plains viscacha	Rodents	Short-lived
Chinchilla_lanigera	Long-tailed chinchilla	Rodents	Short-lived
Octodon_degus	Defu	Rodents	Short-lived
Heterocephalus_glaber	Naked mole rat	Rodents	Short-lived
Fukomys_damarensis	Damaraland mole-rats	Rodents	Short-lived
Aplodontia_rufa	Arena Mountain Beaver	Rodents	Short-lived
Marmota_marmota	Alpine marmot	Rodents	Short-lived
Spermophilus_citellus	European ground squirrel	Rodents	Short-lived
Dipodomys_phillipsii	Kangaroo rat	Rodents	Short-lived	Maternal_PRL	Luteotrophic
Mus_musculus	Mice	Rodents	Ultra-short	Maternal_PRL	Luteotrophic
Cricetus_cricetus	Hamster	Rodents	Ultra-short	Maternal_PRL	Luteotrophic
Rattus_norvegicus	Black rat	Rodents	Ultra-short	Maternal_PRL	Luteotrophic
Notomys_alexis	Spinifex hopping mouse	Rodents	Short-lived
Acomys_cahirinus	African spiny mouse	Rodents	Short-lived
Perodicticus_potto	West African potto	Primate	Short-lived
Otolemur_crassicaudatus	Brown greater galago	Primate	Short-lived
Carlito_syrichta	Philippines tarsier	Primate	Short-lived
Lemur_catta	Ring-tailed lemur	Primate	Short-lived
Callithrix_jacchus	Common marmoset	Primate	Short-lived	CG	Luteotrophic
Papio_papio	Baboon	Primate	Short-lived	CG	Luteotrophic
Macaca_mulatta	Rhesus macaque	Primate	Short-lived	CG	Luteotrophic
Homo_sapiens	Humans	Primate	Short-lived	CG	Luteotrophic
Loris_tardigradus	Slender loris	Primate	Short-lived
Tupaia_montana	Tree shrew	Scadentia	Short-lived
Cephalopachus_bancanus	Tarsier	Primate	Short-lived
Gorilla_gorilla	Gorilla	Primate	Short-lived	CG	Luteotrophic

## Sheet: Supplementary Data 3
Supplementary Data 3. Cycle and gestation day values for regression plots and phylogenetic analysis
Species	Common Name	Order	Superorder	Cycle_length	Gestation_length_d_AnAge	wtcorrCL	wtcorrPrg	Body_mass_g_AnAge	Prec/altr
Dasypus_novemcinctus	Nine-banded armadillo	Cingulata	Xenarthra	NA	133	NA	2.1803	5500	prec
Euphractus_sexcinctus	Six-banded armadillo	Cingulata	Xenarthra	26	68	1.2411	1.7661	4850	altr
Tolypeutes_matacus	Three-banded armadillo	Cingulata	Xenarthra	25	120	1.4715	2.2155	1500	prec
Myrmecophaga_tridactyla	Giant anteater	Cingulata	Xenarthra	54	184	1.4139	2.1359	28500	altr
Bradypus_torquatus	Maned three-toed sloth	Cingulata	Xenarthra	NA	150	NA	2.2541	3875	prec
Choloepus_didactylus	Southern two-toed sloth	Cingulata	Xenarthra	30	279	1.503	2.4942	6250	prec
Choloepus_hoffmanni	Two-toed sloth	Cingulata	Xenarthra	16	350	1.23	2.5926	6250	prec
Loxodonta_africana	African savanna elephant	Proboscidea	Afrotheria	112	670	1.8667	2.4914	3175000	prec
Elephas_maximus	Asian elephant	Proboscidea	Afrotheria	105	644	1.8441	2.4842	2700000	prec
Dugong_dugon	Sea cow	Sirenia	Afrotheria	50	374	1.5893	2.3721	360000	prec
Trichechus_inunguis	Amazon manatee	Sirenia	Afrotheria	30	328	1.3578	2.2974	480000	prec
Procavia_capensis	Cape rock hyrax	Hyracoidea	Afrotheria	13	215	1.1582	2.4149	3600	prec
Tenrec_ecaudatus	Tailless tenrec	Macroscelidea	Afrotheria	NA	58	NA	1.7566	900	altr
Echinops_telfairi	Small madagascar hedgehog	Macroscelidea	Afrotheria	6	55	0.8732	1.7904	180	altr
Elephantulus_myurus	Eastern rock elephant shrew	Afrosoricida	Afrotheria	12	51	1.2604	2.0419	60	prec
Bos_taurus	Cattle	Artiodactyla	Laurasiatheria	21	277	1.188	2.1966	750000	prec
Sus_scrofa	Pig	Artiodactyla	Laurasiatheria	20	115	1.2254	1.9226	130000	prec
Ovis_aries	Sheep	Artiodactyla	Laurasiatheria	18	146	1.1959	2.0561	80000	prec
Capra_nubiana	Goat	Artiodactyla	Laurasiatheria	20	150	1.2599	2.1015	46250	prec
Camelus_bactrianus	Bactrian camel	Artiodactyla	Laurasiatheria	28	395	1.3282	2.3788	475000	prec
Naemorhedus_griseus	Chinese goral	Artiodactyla	Laurasiatheria	21	215	1.2934	2.2806	32000	prec
Tragulus_javanicus	Lesser Malay mouse deer	Artiodactyla	Laurasiatheria	15	159	1.2368	2.3142	2200	prec
Equus_caballus	Horse	Perissodactyla	Laurasiatheria	21	337	1.2186	2.3381	300000	prec
Rhinoceros_unicornis	Indian rhinoceros	Perissodactyla	Laurasiatheria	43	479	1.4738	2.3877	1602330	prec
Ceratotherium_simum	White rhinoceros	Perissodactyla	Laurasiatheria	68	515	1.6709	2.4156	1700000	prec
Dicerorhinus_sumatrensis	Asian rhinoceros	Perissodactyla	Laurasiatheria	21	236	1.1903	2.1312	700000	prec
Delphinapterus_leucas	Beluga whale	Cetacea	Laurasiatheria	50	416	1.5568	2.3586	950000	prec
Tursiops_truncatus	Atlantic bottlenose dolphin	Cetacea	Laurasiatheria	27	365	1.3413	2.3977	200000	prec
Orcinus_orca	Orca whale	Cetacea	Laurasiatheria	40	510			3500000	prec
Lagenorhynchus_obliquidens	Pacific white-sided dolphin	Cetacea	Laurasiatheria	31	320	1.4235	2.3814	103000	prec
Balaenoptera_bonaerensis	Minke whale	Cetacea	Laurasiatheria	NA	305	NA	2.0909	8250000	prec
Nycticeinops_schlieffeni	Schlieffen's bat	Chiroptera	Laurasiatheria	NA	77	NA	2.0653	4.7	altr
Rousettus_leschenaultii	Fulvous fruit bat	Chiroptera	Laurasiatheria	33	115			108.25	altr
Carollia_perspicillata	Short-tailed Fruit Bat	Chiroptera	Laurasiatheria	25	95	1.6255	2.3974	15	prec
Miniopterus_natalensis	Natal clinging bat	Chiroptera	Laurasiatheria	NA	NA	NA	NA	NA	altr
Myotis_lucifugus	Little brown bat	Chiroptera	Laurasiatheria	NA	55	NA	1.8925	10	altr
Mustela_lutreola	European Mink	Carnivora	Laurasiatheria	36	54	1.5544	1.7405	590	altr
Mustela_erminea	Ermine	Carnivora	Laurasiatheria	30	43	1.6121	1.7008	110.3	altr
Cystophora_cristata	Hooded seal	Carnivora	Laurasiatheria	NA	240	NA	2.5971	405	prec
Ursus_arctos	Brown bears	Carnivora	Laurasiatheria	NA	103	NA	1.8035	277500	altr
Canis_lupus	Domestic dog	Carnivora	Laurasiatheria	100	62			26625	altr
Chrysocyon_brachyurus	Maned wolf	Carnivora	Laurasiatheria	NA	64	NA	1.6872	21500	altr
Panthera_leo	Lion	Carnivora	Laurasiatheria	28	109	0.9931	1.8498	150000	altr
Panthera_uncia	Snow leopard	Carnivora	Laurasiatheria	NA	NA	NA	NA	50000	altr
Felis_catus	Domestic cat	Carnivora	Laurasiatheria	20	65	1.1449	1.7542	3900	altr
Lynx_lynx	Eurasian lynx	Carnivora	Laurasiatheria	NA	66	NA	1.6982	23000	altr
Lynx_rufus	Bobcat	Carnivora	Laurasiatheria	40	65	1.3814	1.7263	8600	altr
Blarina_brevicauda	Short-tailed shrew	Eulipotyphla	Laurasiatheria	3	17	0.7452	1.3554	21.6	altr
Solenodon_paradoxus	Hispaniolan solenodon	Eulipotyphla	Laurasiatheria	11	50	0.9964	1.6884	1000	altr
Oryctolagus_cuniculus	European rabbit	Lagomorpha	Euarchontoglires	12	30	0.9862	1.4458	1800	altr
Cavia_porcellus	Guinea pig	Rodents	Euarchontoglires	16	68	1.3019	2.0133	728	prec
Lagostomus_maximus	Plains viscacha	Rodents	Euarchontoglires	45	154	1.6804	2.2386	6000	prec
Chinchilla_lanigera	Long-tailed chinchilla	Rodents	Euarchontoglires	35	111	1.646	2.2338	642.5	prec
Octodon_degus	Defu	Rodents	Euarchontoglires	20	90	1.4366	2.2046	235	prec
Heterocephalus_glaber	Naked mole rat	Rodents	Euarchontoglires	34	70	1.7602	1.953	35	altr
Fukomys_damarensis	Damaraland mole-rats	Rodents	Euarchontoglires	34	84	1.6361	1.9785	160	altr
Aplodontia_rufa	Arena Mountain Beaver	Rodents	Euarchontoglires	18	29	1.2007	1.4477	1125	altr
Marmota_marmota	Alpine marmot	Rodents	Euarchontoglires	18	35	1.108	1.4892	3500	altr
Spermophilus_citellus	European ground squirrel	Rodents	Euarchontoglires	15	27	1.2558	1.4748	217	altr
Dipodomys_phillipsii	Kangaroo rat	Rodents	Euarchontoglires	12	NA	1.2821	NA	48	altr
Mus_musculus	Mice	Rodents	Euarchontoglires	4	19	0.8744	1.4055	20.5	altr
Cricetus_cricetus	Hamster	Rodents	Euarchontoglires	4	20	0.6126	1.3145	506.7	altr
Rattus_norvegicus	Black rat	Rodents	Euarchontoglires	4	21	0.6554	1.3542	300	altr
Notomys_alexis	Spinifex hopping mouse	Rodents	Euarchontoglires	8	35	1.1318	1.6519	35	altr
Acomys_cahirinus	African spiny mouse	Rodents	Euarchontoglires	8	38	1.0938	1.9316	45.2	prec
Perodicticus_potto	West African potto	Primate	Euarchontoglires	38	170	1.6697	2.3969	920	prec
Otolemur_crassicaudatus	Brown greater galago	Primate	Euarchontoglires	44	130	1.7275	2.2697	1095	prec
Carlito_syrichta	Philippines tarsier	Primate	Euarchontoglires	22	179	1.5007	2.545	119.2	prec
Lemur_catta	Ring-tailed lemur	Primate	Euarchontoglires	39	135	1.6468	2.2339	2555	prec
Callithrix_jacchus	Common marmoset	Primate	Euarchontoglires	29	144	1.5952	2.4037	255.2	prec
Papio_papio	Baboon	Primate	Euarchontoglires	33	180	1.5225	2.2637	12000	prec
Macaca_mulatta	Rhesus macaque	Primate	Euarchontoglires	28	165	1.4638	2.2491	8235	prec
Homo_sapiens	Humans	Primate	Euarchontoglires	28	280	1.3962	2.3546	62035	prec
Loris_tardigradus	Slender loris	Primate	Euarchontoglires	34	166	1.6666	2.4697	238.2	prec
Tupaia_montana	Tree shrew	Scadentia	Euarchontoglires	10	50	1.1216	1.7605	130	altr
Cephalopachus_bancanus	Tarsier	Primate	Euarchontoglires	22	178	1.4998	2.5409	122.5	prec
Gorilla_gorilla	Gorilla	Primate	Euarchontoglires	33	256	1.4474	2.2785	113500	prec
Potorous_tridactylus	Long-nosed potoroo	Diprotodontia	Australidelphia	42	38	1.5538	1.5586	1350	altr
Notamacropus_eugenii	Tammar wallaby	Diprotodontia	Australidelphia	30	29	1.2745	1.3836	6900	altr
Bettongia_gaimardi	Eastern betong	Diprotodontia	Australidelphia	19.5	21			1200	altr
Perameles_nasuta	Long-nosed bandicoot	Peramelemorphia	Australidelphia	21	12.5			760	altr
